# Supplementary material
Source: Springer Nature journal article supplement (https://www.springermedizin.de/resource/supplementary/12879_2011_1680_MOESM3_ESM.pdf/9443076)
Supplement: MOESM3 [file 9443076]

# Guangzhou

## All-cause mortality

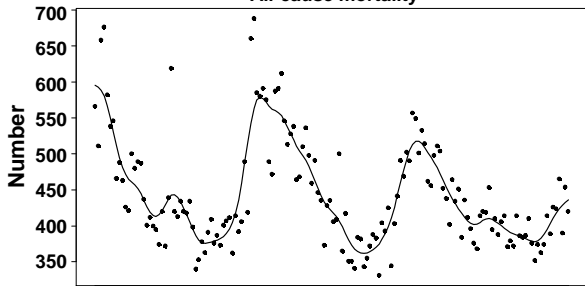

## Temperature

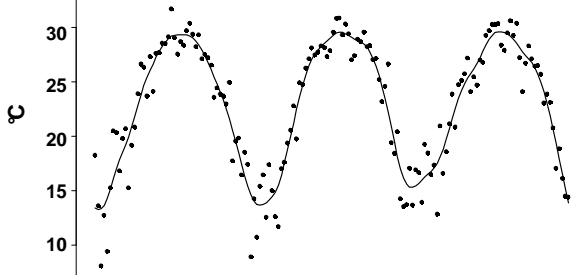

## Relative humidity

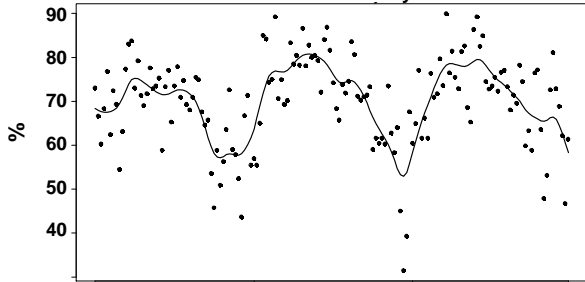

## Vapor pressure

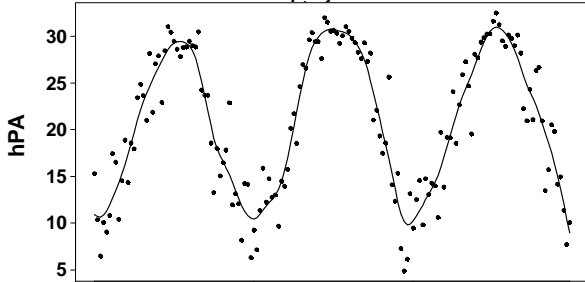

## Influenza virus

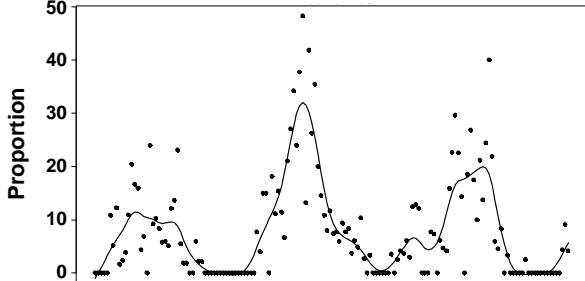

Year

# Hong Kong

## All-cause mortality

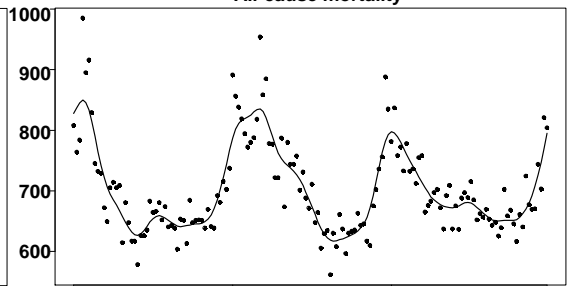

## Temperature

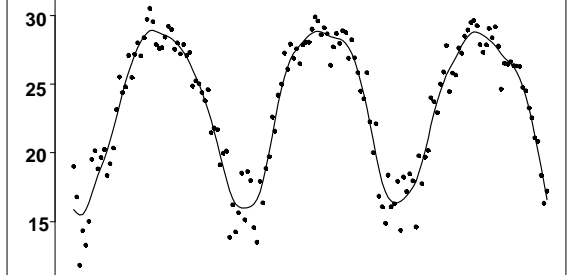

## Relative humidity

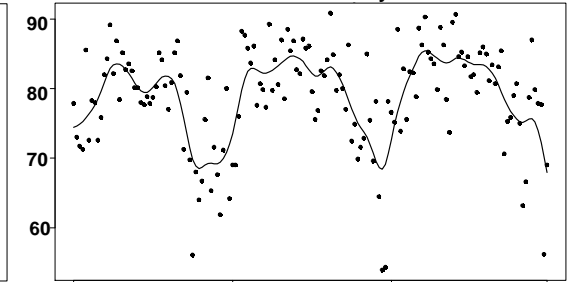

## Vapor pressure

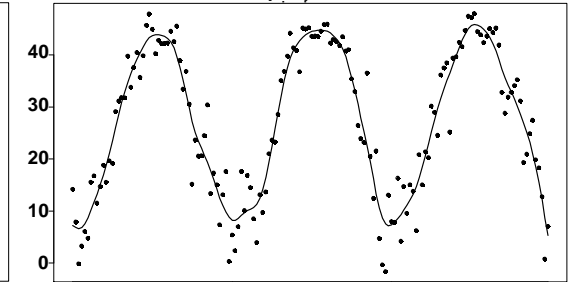

## Influenza virus

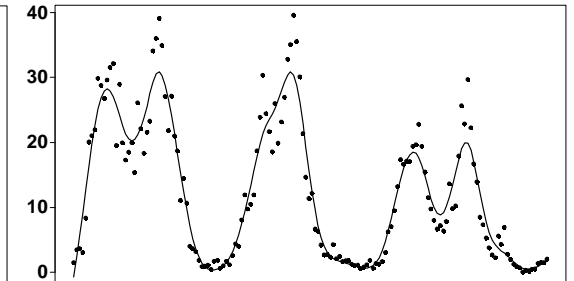

Year
